# Supplementary material
Source: publisher site journal article supplement (https://www.spandidos-publications.com/3653/downloadSupplementary)
Supplement: Supplementary file 1 [file downloadSupplementary]

## Sheet: Sheet1
Table SVI. Raw data of serum PROS1 determined by ELISA.
No.	Well No.	Sample No.	Absorbance	Calibrated OD Value	Quantitative Value (Dilution ratio 1:500)	Final Concentration, ng/ml	Item Name
1	A2	S7	2.2764	2.13595	N/A	N/A	PROS1
2	B2	S7	2.2973	2.15685	N/A	N/A	PROS1
3	C2	S6	1.8227	1.68225	N/A	N/A	PROS1
4	D2	S6	1.7447	1.60425	N/A	N/A	PROS1
5	E2	S5	1.0841	0.94365	N/A	N/A	PROS1
6	F2	S5	1.1145	0.97405	N/A	N/A	PROS1
7	G2	S4	0.7204	0.57995	N/A	N/A	PROS1
8	H2	S4	0.6516	0.51115	N/A	N/A	PROS1
9	A3	S3	0.4762	0.33575	N/A	N/A	PROS1
10	B3	S3	0.4026	0.26215	N/A	N/A	PROS1
11	C3	S2	0.3316	0.19115	N/A	N/A	PROS1
12	D3	S2	0.339	0.19855	N/A	N/A	PROS1
13	E3	S1	0.1988	0.05835	N/A	N/A	PROS1
14	F3	S1	0.1764	0.03595	N/A	N/A	PROS1
15	G3	S0	0.1429	0.00245	N/A	N/A	PROS1
16	H3	S0	0.138	-0.00245	N/A	N/A	PROS1
17	A4	1-1	0.891	0.75055	37.7321	18866.1	PROS1
18	B4	1-1	0.8775	0.73705	36.9444	18472.2	PROS1
19	C4	1-2	1.2291	1.08865	57.0806	28540.3	PROS1
20	D4	1-2	1.2942	1.15375	60.8951	30447.5	PROS1
21	E4	2-1	1.4029	1.26245	67.6146	33807.3	PROS1
22	F4	2-1	1.3514	1.21095	64.3614	32180.7	PROS1
23	G4	2-2	1.7585	1.61805	97.2315	48615.8	PROS1
24	H4	2-2	1.6939	1.55345	90.4968	45248.4	PROS1
25	A5	3-1	0.5741	0.43365	19.1344	9567.2	PROS1
26	B5	3-1	0.5555	0.41505	18.0777	9038.85	PROS1
27	C5	3-2	0.9624	0.82195	41.8672	20933.6	PROS1
28	D5	3-2	0.9468	0.80635	40.9682	20484.1	PROS1
29	E5	4-1	1.3173	1.17685	62.2793	31139.6	PROS1
30	F5	4-1	1.336	1.19555	63.4149	31707.5	PROS1
31	G5	4-2	1.455	1.31455	71.0744	35537.2	PROS1
32	H5	4-2	1.3919	1.25145	66.9072	33453.6	PROS1
33	A6	5-1	2.0697	1.92925	144.723	72361.5	PROS1
34	B6	5-1	1.9918	1.85135	129.953	64976.5	PROS1
35	C6	5-2	2.1631	2.02265	165.698	82849	PROS1
36	D6	5-2	2.1539	2.01345	163.459	81729.5	PROS1
37	E6	6-1	2.0163	1.87585	134.354	67177	PROS1
38	F6	6-1	1.9843	1.84385	128.648	64324	PROS1
39	G6	6-2	2.3755	2.23505	229.873	114936	PROS1
40	H6	6-2	2.3736	2.23315	229.18	114590	PROS1
41	A7	7-1	0.5474	0.40695	17.6209	8810.45	PROS1
42	B7	7-1	0.5278	0.38735	16.5251	8262.55	PROS1
43	C7	7-2	0.7797	0.63925	31.1926	15596.3	PROS1
44	D7	7-2	0.7317	0.59125	28.3523	14176.1	PROS1
45	E7	8-1	1.8774	1.73695	112.026	56013	PROS1
46	F7	8-1	1.9171	1.77665	117.789	58894.5	PROS1
47	G7	8-2	2.1894	2.04895	172.325	86162.5	PROS1
48	H7	8-2	2.1518	2.01135	162.953	81476.5	PROS1
49	A8	9-1	1.0081	0.86765	44.4877	22243.8	PROS1
50	B8	9-1	0.9222	0.78175	39.5454	19772.7	PROS1
51	C8	9-2	1.1191	0.97865	50.7976	25398.8	PROS1
52	D8	9-2	1.0801	0.93965	48.5853	24292.6	PROS1
53	E8	10-1	1.1392	0.99875	51.9384	25969.2	PROS1
54	F8	10-1	1.1942	1.05375	55.0729	27536.4	PROS1
55	G8	10-2	1.6867	1.54625	89.7944	44897.2	PROS1
56	H8	10-2	1.601	1.46055	82.0763	41038.2	PROS1
57	A9	11-1	1.9196	1.77915	118.168	59084	PROS1
58	B9	11-1	1.9769	1.83645	127.38	63690	PROS1
59	C9	11-2	2.2112	2.07075	178.076	89038	PROS1
60	D9	11-2	2.2824	2.14195	198.604	99302	PROS1
61	E9	12-1	1.3998	1.25935	67.4145	33707.2	PROS1
62	F9	12-1	1.3106	1.17015	61.8759	30938	PROS1
63	G9	12-2	1.6567	1.51625	86.9626	43481.3	PROS1
64	H9	12-2	1.6616	1.52115	87.415	43707.5	PROS1
65	A10	13-1	1.787	1.64655	100.473	50236.5	PROS1
66	B10	13-1	1.8809	1.74045	112.516	56258	PROS1
67	C10	13-2	2.0256	1.88515	136.082	68041	PROS1
68	D10	13-2	1.9896	1.84915	129.568	64784	PROS1
69	E10	14-1	2.3993	2.25885	238.748	119374	PROS1
70	F10	14-1	2.3404	2.19995	217.457	108728	PROS1
71	G10	14-2	2.3013	2.16085	204.528	102264	PROS1
72	H10	14-2	2.4179	2.27745	245.951	122976	PROS1
73	A11	15-1	2.2294	2.08895	183.064	91532	PROS1
74	B11	15-1	2.1881	2.04765	171.999	85999.5	PROS1
75	C11	15-2	2.2372	2.09675	185.255	92627.5	PROS1
76	D11	15-2	2.2542	2.11375	190.144	95072	PROS1
77	E11	16-1	2.1519	2.01145	162.977	81488.5	PROS1
78	F11	16-1	2.2283	2.08785	182.758	91379	PROS1
79	G11	16-2	2.2889	2.14845	200.618	100309	PROS1
80	H11	16-2	2.2716	2.13115	195.311	97655.5	PROS1
81	A12	17-1	1.8559	1.71545	109.089	54544.5	PROS1
82	B12	17-1	1.8546	1.71415	108.916	54458	PROS1
83	C12	17-2	2.0368	1.89635	138.205	69102.5	PROS1
84	D12	17-2	1.9142	1.77375	117.353	58676.5	PROS1
PROS1, protein S isoform 1; N/A, not applicable.
